# Supplementary material for: Obstacles and facilitators of return to work among people with persistent pain who receive benefit payments: an in-depth interview study
Source: Research Square preprint supplement (doi:10.21203/rs.3.rs-5655501/v1), 2025-04-10

## Supplementary file 2. Themes and subthemes

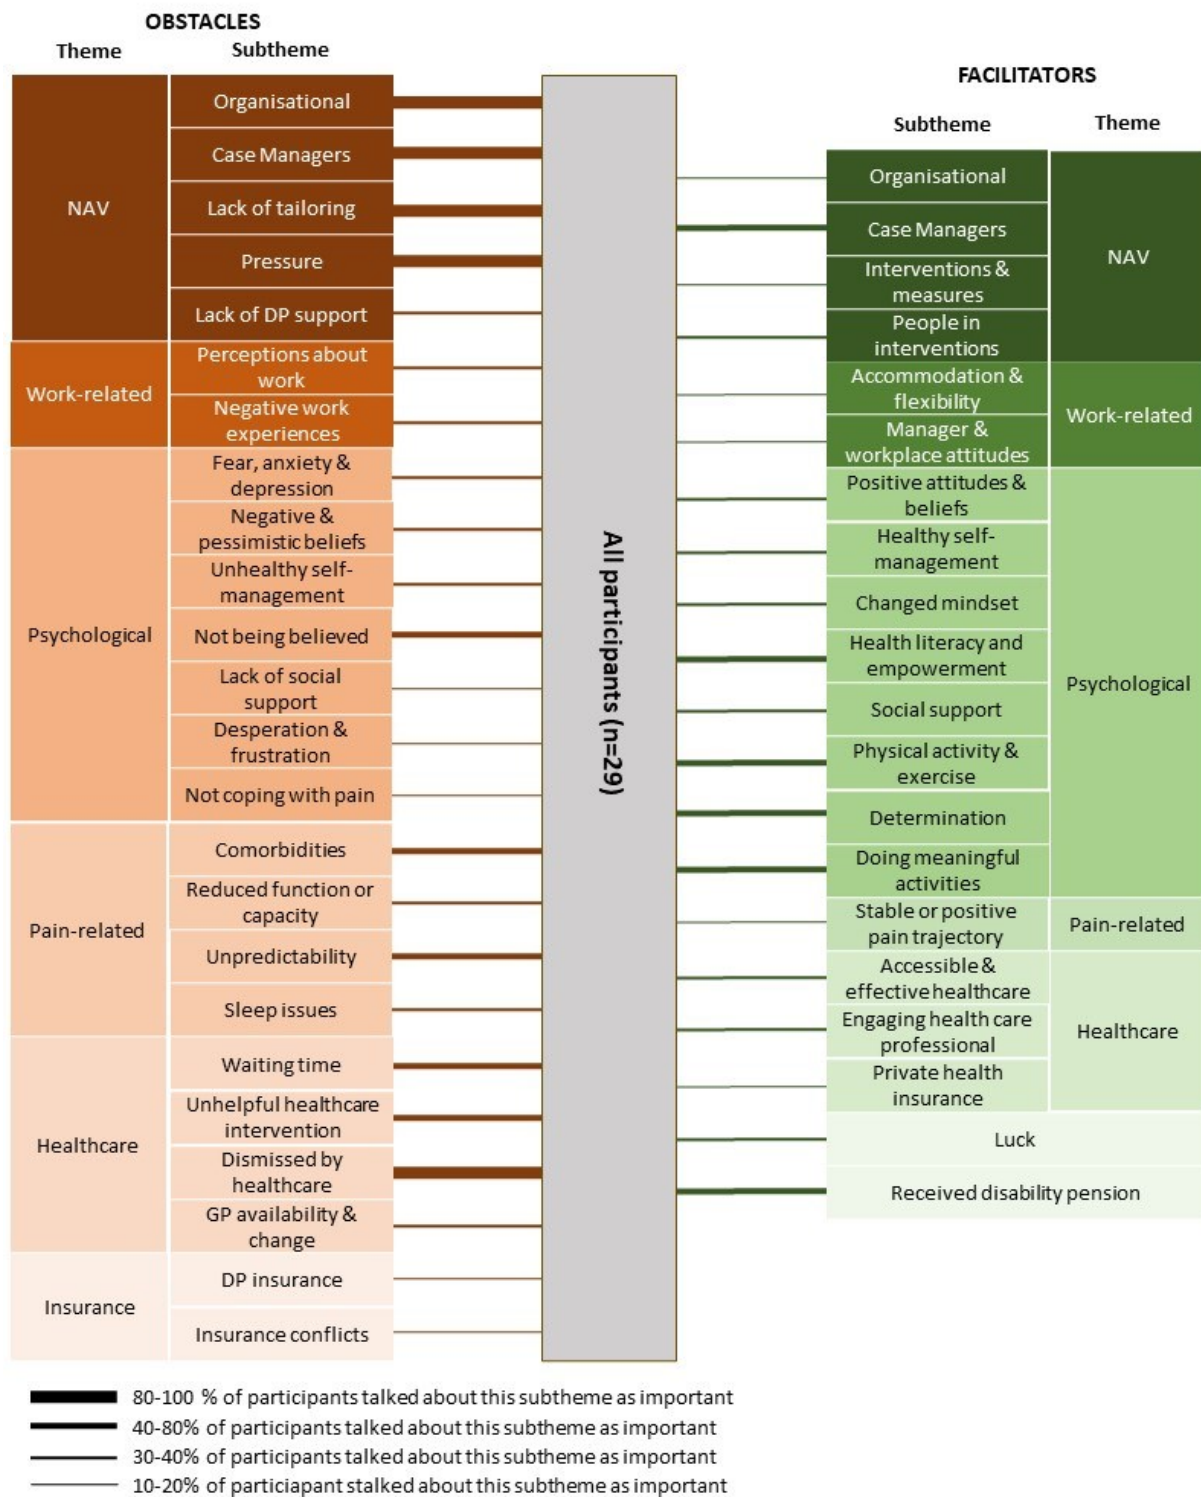

Supplement: Supplementary file [file 43e6d2ffdbb4ce34af9732f9.pdf]
